# Supplementary material
Source: ML conference proceedings conference paper supplement (https://openreview.net/forum?id=nosngu5XwY9)
Supplement: supplementary_material [file attachment]

# 1 Supplementary material (SM)

## 2 Contents

|    |                                                                                                        |          |
|----|--------------------------------------------------------------------------------------------------------|----------|
| 3  | <b>A Additional model training and hyperparameter selection details</b>                                | <b>1</b> |
| 4  | A.1 Training details for simulations in the gridworld environment . . . . .                            | 1        |
| 5  | A.2 Method to align generative and recovered parameters . . . . .                                      | 1        |
| 6  | A.3 Training details for experiment on the mouse dataset . . . . .                                     | 2        |
| 7  | A.4 Hyperparameter selection for Max. Ent. and Deep Max. Ent. comparisons . . . . .                    | 3        |
| 8  | <b>B Mouse decision-making data</b>                                                                    | <b>3</b> |
| 9  | B.1 Clustering algorithm for aligning trajectories across animals and bouts . . . . .                  | 4        |
| 10 | B.2 Population summary plot: all trajectories for each cohort . . . . .                                | 4        |
| 11 | <b>C DURL objective function</b>                                                                       | <b>5</b> |
| 12 | <b>D Additional DURL results</b>                                                                       | <b>5</b> |
| 13 | D.1 Simulations in the labyrinth environment . . . . .                                                 | 5        |
| 14 | D.2 Additional results on real data: 3-map fits for water-restricted mice . . . . .                    | 6        |
| 15 | D.3 Trajectories simulated by DURL better resemble mouse data compared to those from other IRL methods | 7        |
| 16 | <b>E Code implementation of DURL</b>                                                                   | <b>7</b> |

## 17 A Additional model training and hyperparameter selection details

### 18 A.1 Training details for simulations in the gridworld environment

19 For inferring the time-varying rewards in the gridworld environment, we varied the number of maps,  $K$ , between  
20 1 and 4 (shown in Fig. 3F), and varied the learning rates for the weights and the goal maps to take on values in  
21  $[0.05, 0.01, 0.005, 0.001]$ . We fixed the discount factor  $\gamma$ , and the noise variance of the random walk prior  $\sigma$  to their  
22 generative values of 0.9 and  $2^{-3.5}$  respectively. Finally, we initialized with 10 different random seeds. We selected  
23 hyperparameters using validation-set log-likelihood; the learning rates that resulted in the fits shown in Fig. 3 were 0.05  
24 for the weights and 0.001 for the maps.

### 25 A.2 Method to align generative and recovered parameters

26 As mentioned in section 4.1, we perform a post hoc processing method to the parameters recovered by DURL in order to  
27 compare them to the generative parameters. This is because of the fact that several parameter settings can result in the  
28 same time-varying policy (Eq. 3). Firstly, the recovered rewards are only identifiable up to an additive constant, as  
29 the policy (Eq. 3) does not change upon the addition of a constant to the rewards at a fixed time point. Secondly, our  
30 reward parameterization (Eq. 1) is invariant to any scaling of the goal maps accompanied by an inverse scaling of the  
31 time-varying weights. Finally, the retrieved maps and weights can be permuted relative to the generative maps and  
32 weights (e.g. generative goal map 1 becomes recovered goal map 3). Keeping the above invariances in mind, we come  
33 up with a procedure to align the generative and recovered goal maps and time-varying weights.

34 Concretely, let the superscript  $g$  and  $d$  denote the generative and the DURL-recovered parameters respectively, such that  
35 the generative and recovered rewards for state  $s$  at time point  $t$  are given as:

$$r_t^g(s) = \sum_k \alpha_{k,t}^g u_{k,s}^g \quad (\text{S1})$$

$$r_t^d(s) = \sum_k \alpha_{k,t}^d u_{k,s}^d \quad (\text{S2})$$

36 Here,  $\alpha_{k,t}$  corresponds to the weight at time  $t$  on the  $k$ th goal map,  $u_k \in \mathbb{R}^S$ . First of all, our recovered parameters  
 37 may not be in the same order as the generative parameters:  $u_k^d$  may correspond to  $u_{k'}^g$ , where  $k \neq k'$ . Hence, we apply  
 38 our alignment algorithm on all possible permutations of the  $K$  recovered maps and weights. We select the permutation  
 39 that leads to the smallest  $l_2$  distance between the aligned generative and recovered parameters.

40 Now, for each permutation of the recovered parameters, to align them with the generative parameters, we perform a  
 41 sign conversion. Our reward parameterization allows for sign invariances such that:

$$\alpha_{k,t} u_{k,s} = (-\alpha_{k,t})(-u_{k,s}) \quad (\text{S3})$$

42 This means that  $\{\alpha_k^d, u_k^d\}$  can both have signs that are flipped respective to the corresponding generative parameters,  
 43  $\{\alpha_k^g, u_k^g\}$ . We use the time-varying weights to determine whether or not to flip the signs of the recovered parameters,  
 44  $\{\alpha_k^d, u_k^d\}$ . In particular, we flip the signs of the recovered parameters if

$$\left(\sum_t |\alpha_{k,t}^g - \alpha_{k,t}^d|^2\right)^{1/2} > \left(\sum_t |\alpha_{k,t}^g + \alpha_{k,t}^d|^2\right)^{1/2}. \quad (\text{S4})$$

45 We have two remaining free degrees of freedom to set: (1) the constant, state-independent offset,  $c_k$ , that can be added  
 46 to each goal map without affecting the recovered time-varying policy and (2) the scale of the goal maps,  $s_k$ , which,  
 47 accompanied by an inverse-scaling of the time-varying weights, has no effect on the recovered reward function. We set  
 48  $c_k$  and  $s_k$  so that the maximum and minimum values of the recovered goal maps match those of the generative goal  
 49 maps. Thus,  $\{c_k, s_k\}$  are solutions of the following set of equations:

$$\min_{s \in \mathcal{S}} s_k u_{k,s}^d + c_k = \min_{s \in \mathcal{S}} u_{k,s}^g \quad (\text{S5})$$

$$\max_{s \in \mathcal{S}} s_k u_{k,s}^d + c_k = \max_{s \in \mathcal{S}} u_{k,s}^g \quad (\text{S6})$$

50 Since we performed a sign flipping operation earlier, we can assume, without loss of generality, that  $s_k > 0 \forall k$ . These  
 51 assumptions allow us to solve the above set of equations analytically, leading to closed-form expressions for  $s_k$  and  $c_k$ .  
 52 Let's define  $m_{0,k}^d \equiv \min_s u_{k,s}^d$ ,  $m_{1,k}^d \equiv \max_s u_{k,s}^d$  and  $m_{0,k}^g \equiv \min_s u_{k,s}^g$ ,  $m_{1,k}^g \equiv \max_s u_{k,s}^g$ . Then:

$$c_k = \frac{m_{0,k}^g m_{1,k}^d - m_{0,k}^d m_{1,k}^g}{m_{1,k}^d - m_{0,k}^d} \quad (\text{S7})$$

$$s_k = \frac{m_{1,k}^g - m_{0,k}^g}{m_{1,k}^d - m_{0,k}^d} \quad (\text{S8})$$

53 Hence, we obtain our aligned goal maps and time varying weights as follows:

$$u_{k,s}^{d'} = s_k u_{k,s}^d + c_k \quad \forall s \in \mathcal{S}, k \in \{1, \dots, K\} \quad (\text{S9})$$

$$\alpha_{k,t}^{d'} = \frac{\alpha_{k,t}^d}{s_k} \quad \forall t \in \{1, \dots, T\}, k \in \{1, \dots, K\} \quad (\text{S10})$$

54 As mentioned earlier, we apply the above set of transformations (sign-flipping, scaling and applying offsets) for each  
 55 possible permutation of the recovered parameters, and choose the permutation that results in the minimum  $l_2$  distance  
 56 between the recovered and generative parameters.

### 57 A.3 Training details for experiment on the mouse dataset

58 To fit DURL on the trajectories obtained from the cohorts of water-restricted and water-unrestricted mice, we swept  
 59 over the range of hyperparameters mentioned in Table. S1. For each hyperparameter setting, we initialized DURL with

| Hyperparameter               | Range                          |
|------------------------------|--------------------------------|
| no. of maps, $K$             | $\{1, 2, 3, 4\}$               |
| noise variance, $\sigma$     | $[2^{-3.5}, 1]$                |
| discount factor, $\gamma$    | $\{0.99, 0.9, 0.7\}$           |
| $l_2$ coefficient, $\lambda$ | $\{0, 1e-3, 1e-2, 1e-1, 1.0\}$ |
| learning rate for maps       | $\{0.05, 0.01, 0.005\}$        |
| learning rate for weights    | $\{0.05, 0.01, 0.005\}$        |

Table S1: Hyperparameters for fitting DURL on the mouse dataset

60 multiple different seeds (between 2 and 10, depending on the specific experiment). We selected the best hyperparameters  
61 based on validation log-likelihood, as well as interpretability of the retrieved parameters. For example, in Figure 4,  
62 we focused on the 2-map solution as opposed to the 3-map solution. Both solutions had comparable validation-set  
63 performance, but the 3-map solution corresponded to splitting the ‘water’ goal map/weights into two slightly different  
64 ‘water’ goal maps: see section D.2.

65 The results for water-restricted mice (shown in Fig. 4) correspond to 2 maps,  $\gamma = 0.7$ ,  $\sigma = 0.25$ ,  $\lambda = 0.001$  and had the  
66 learning rate for maps and weights set to 0.005 and 0.05 respectively. The results for water-unrestricted mice (shown in  
67 Fig. 5) correspond to 2 maps,  $\gamma = 0.99$ ,  $\sigma = 0.09$ ,  $\lambda = 0.001$  and had the learning rates for the maps and weights set  
68 to 0.01 and 0.001 respectively.

#### 69 A.4 Hyperparameter selection for Max. Ent. and Deep Max. Ent. comparisons

70 In Figures 4 and 5, we compare the performance of DURL with two popular IRL frameworks: the maximum en-  
71 tropy framework of Ziebart et al. [1] and the deep maximum entropy framework of Wulfmeier et al. [2]. In order  
72 to conduct these comparisons, we used the implementations of these frameworks provided by Lu [3]. For the max-  
73 imum entropy framework, we varied the discount factor  $\gamma$  in  $[0.99, 0.9, 0.7, 0.5]$ , and varied the learning rate in  
74  $[0.001, 0.005, 0.01, 0.05, 0.1]$ . For the water-restricted mice shown in Fig. 4, we found that the best-fitting hyperparam-  
75 eters were  $\gamma = 0.7$  and the optimal learning rate was 0.1. For the water unrestricted mice, we found that the best-fitting  
76 hyperparameters were  $\gamma = 0.5$  and learning rate 0.05.

| Hyperparameter               | Range                               |
|------------------------------|-------------------------------------|
| discount factor, $\gamma$    | $\{0.99, 0.9, 0.7, 0.5\}$           |
| $l_2$ coefficient, $\lambda$ | $\{0, 1, 10\}$                      |
| learning rate                | $\{0.001, 0.005, 0.01, 0.05, 0.1\}$ |
| layer width                  | $\{5, 10, 20, 50\}$                 |

Table S2: Hyperparameters for fitting Deep Max. Ent. [2] to mouse data

77 When fitting the deep maximum entropy framework to the mouse data, we modified the implementation provided in  
78 [3] to use 3 fully-connected layers as opposed to 2 fully-connected layers (we anticipated greater depth being better  
79 at fitting this data) to map the state identity to the reward for that state. We also allowed for the width of each layer  
80 to take on the values shown in Table S2. The implementation provided by [3] uses Exponential Linear Unit (ELU)  
81 activation functions, and applies an  $l_2$  penalty to the weights of the network. Along with the layer width, we allowed  
82 the discount factor,  $\gamma$ , the strength of the  $l_2$  penalty term,  $\lambda$ , and the learning rate to take on the values specified in Table  
83 S2. We found that the optimal hyperparameters for the water-restricted mice were  $\gamma = 0.5$ , learning rate= 0.05, layer  
84 width= 50 and  $\lambda = 1$ . For the water-unrestricted mice, the optimal hyperparameters were  $\gamma = 0.5$ , learning rate= 0.1,  
85 layer width= 20 and  $\lambda = 0$ .

## 86 B Mouse decision-making data

87 In Figures 4 and 5, we show the results of applying DURL to the mouse decision-making data of [4]. We obtained  
88 the mouse decision-making data for both cohorts of animals (‘water-restricted’ and ‘water-unrestricted’) from <https://>

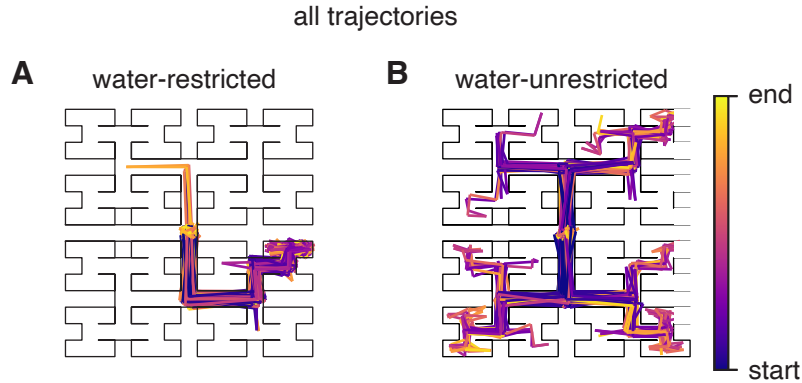

Figure S1: All trajectories overlaid for the water-restricted and unrestricted cohorts studied in text.

89 [//github.com/markusmeister/Rosenberg-2021-Repository](https://github.com/markusmeister/Rosenberg-2021-Repository), which provides the trajectory data for all animals  
 90 under an MIT open source license.

91 In Rosenberg et al. [4], trajectories were obtained by tracking the position of the animal’s nose as it moved through the  
 92 labyrinth environment, and are available at 30Hz. For our analysis, we used the version of trajectories where positions  
 93 were assigned to the nearest of the 127 maze nodes. So as to reduce the effect of any rounding errors introduced by doing  
 94 this, we downsampled trajectories so that each timestep in a trajectory corresponded to 1 second. The decision-making  
 95 data of Rosenberg et al. [4] is naturally segmented into ‘bouts’, where each bout corresponds to the animal leaving its  
 96 home cage and ends when the animal returns home. Every trajectory we considered corresponds to a single bout.

### 97 B.1 Clustering algorithm for aligning trajectories across animals and bouts

98 In Figures 4 and 5, we show the results of applying DIRT to 200 trajectories from the water-restricted animals and 207  
 99 trajectories for the water-unrestricted mice, respectively. In order to obtain these trajectories, we applied clustering so as  
 100 to obtain trajectories corresponding to similar goal maps and similar time-varying weights. Specifically, we represented  
 101 each trajectory as a string containing the sequence of visited nodes. So that each node was represented by a single  
 102 character, we first converted each node into its ASCII representation (e.g. node 97 became ‘a’). For every pair of  
 103 trajectories (across animals in the same cohort), we then calculated the Levenshtein distance between the associated  
 104 strings representing these trajectories. We then used the implementation of dbscan [5] available in scikit-learn [6]  
 105 (with the maximum distance parameter set to 3 and 6, respectively for the water-restricted and unrestricted animals  
 106 so as obtain  $\sim 200$  trajectories for each cohort, and the minimum number of examples in a cluster set to 5 – we did  
 107 not optimize these hyperparameters) in order to perform the clustering. We analyzed the trajectories assigned to the  
 108 biggest cluster for each cohort. Finally, to ensure that all trajectories studied had the same length, we set the desired  
 109 trajectory length to be the 75th percentile length (we did not optimize this hyperparameter either) across all trajectories  
 110 in the cluster, and then padded trajectories with lengths shorter than this with the location of the home port (and cut off  
 111 trajectories longer than this). Given that the water-restricted mice spent 53% of their time in the maze environment at  
 112 the home cage, while the water-unrestricted mice spent 56% of their time there, this seemed like the natural thing to do.  
 113 Note: the Levenshtein distance metric naturally selects trajectories of approximately the same length, so the overall  
 114 amount of padding applied was low.

### 115 B.2 Population summary plot: all trajectories for each cohort

116 While we show a single trajectory for each cohort in Fig. 1, in Fig. S1 we provide a population summary by showing all  
 117 trajectories for each cohort overlaid.

## 118 C DURL objective function

119 In standard max-entropy RL (when the rewards are static), the policy is chosen so as to optimize the following objective  
 120 function (Appendix A of Haarnoja et al. [7]):

$$J^{\text{static}}(\pi(a|s)) \equiv \sum_t \mathbb{E}_{(s_t, a_t) \sim \rho_\pi} \left[ \sum_{l=0}^{\infty} \gamma^l \mathbb{E}_{(s_{l+t}, a_{l+t}) \sim \pi} [r(s_{l+t}, a_{l+t}) + \mathcal{H}(\pi(\cdot|s_{l+t})) | s_t, a_t] \right] \quad (\text{S11})$$

121 where  $\rho_\pi$  is the probability of arriving at state  $s_t$  at time  $t$  and taking action  $a_t$  when acting according to policy  $\pi$ .  $\gamma$   
 122 is the usual discount factor,  $r(\cdot, \cdot)$  is reward function and  $\mathcal{H}(\pi(\cdot|s_t))$  is the entropy of policy  $\pi$  in state  $s_t$ . The above  
 123 objective corresponds to maximizing the discounted sum of rewards along with the entropy of the policy starting from  
 124 every state-action pair  $(s_t, a_t)$  (weighted with the respective probabilities).

125 In case of DURL, we require our policy to be dynamic and vary with time. The policy given in Eq. 3 optimizes, at each  
 126 timestep  $t$ , the objective function given by:

$$J^{\text{DURL}}(\pi_t(a|s)) \equiv \sum_t \mathbb{E}_{(s_t, a_t) \sim \rho_{\pi_t}} \left[ \sum_{l=0}^{T-t} \gamma^l \mathbb{E}_{(s_{l+t}, a_{l+t}) \sim \pi_t} [r_t(s_{l+t}, a_{l+t}) + \mathcal{H}(\pi_t(\cdot|s_{l+t})) | s_t, a_t] \right] \quad (\text{S12})$$

127 where  $\pi_t$  is the time-varying policy and  $r_t(\cdot, \cdot)$  is time-varying reward function. Here, we also switch to the finite  
 128 horizon case, and the sum now goes to the maximum length of a mouse’s trajectory,  $T$ . The proof that Eq. 3 optimizes  
 129 this objective is a straightforward extension of that given in Appendix A of Haarnoja et al. [7].

130 Note: one limitation of this current objective is that it does not acknowledge the time-varying nature of the policy or  
 131 reward function, and depends only on  $\pi_t$  and  $r_t$ . As an alternative to maximizing Eq. S12 at each timestep, we could  
 132 instead optimize the following objective, which is a function of the policy at all timesteps  $\{\pi_t(a|s)\}_{t=1}^T$ :

$$J^{\text{Modified}}(\{\pi_t(a|s)\}_{t=1}^T) \equiv \sum_t \mathbb{E}_{(s_t, a_t) \sim \rho_{\pi_t}} \left[ \sum_{l=0}^{T-t} \gamma^l \mathbb{E}_{(s_{l+t}, a_{l+t}) \sim \pi_{l+t}} [r_{l+t}(s_{l+t}, a_{l+t}) + \mathcal{H}(\pi_{l+t}(\cdot|s_{l+t})) | s_t, a_t] \right] \quad (\text{S13})$$

133 We chose to go with the approach of optimizing the DURL objective given in Eq. S12 at each timestep for the following  
 134 reasons:

- 135 1. It’s not obvious which objective is more biologically plausible. It is unclear if we should assume that mice  
 136 have full knowledge of their reward function for all future timesteps (Eq. S13) or if they are more likely to  
 137 approximate their future reward function with their reward function at the current timestep (Eq. S12).
- 138 2. It is more computationally efficient to compute Q-values for the objective of Eq. S12. If we were trying to  
 139 optimize the objective in Equation S13, we would likely have to do something akin to the backward pass in the  
 140 forward-backward algorithm [8], and compute Q-values serially. By contrast, in the current set up, we can  
 141 compute Q-values in parallel across timesteps.

142 Despite these reasons for working with Eq. S12, we think it would be a valuable research problem to investigate the  
 143 optimal set of policies for Eq. S13.

## 144 D Additional DURL results

### 145 D.1 Simulations in the labyrinth environment

146 In Figure 3, we show the results of applying DURL to trajectories simulated from a time-varying reward function in a  
 147  $5 \times 5$  gridworld environment. While we focused on the gridworld environment there both to demonstrate the versatility  
 148 of our approach, and to examine the performance of our framework in a standard IRL environment (IRL papers such  
 149 as [9–11] all evaluate performance in a gridworld), it is important to also simulate within the labyrinth environment  
 150 corresponding to the real world data shown in Figures 4 and 5. In Figure S2, we show the results of simulating 200  
 151 trajectories in the 127-node labyrinth using the reward function shown in panel D, a linear combination of the goal maps  
 152 shown in panel A and the time-varying weights shown in panel B. As for the real data, we held out 20% of trajectories  
 153 for model comparison purposes. Reassuringly, model performance peaked at the generative number of maps: 2. We

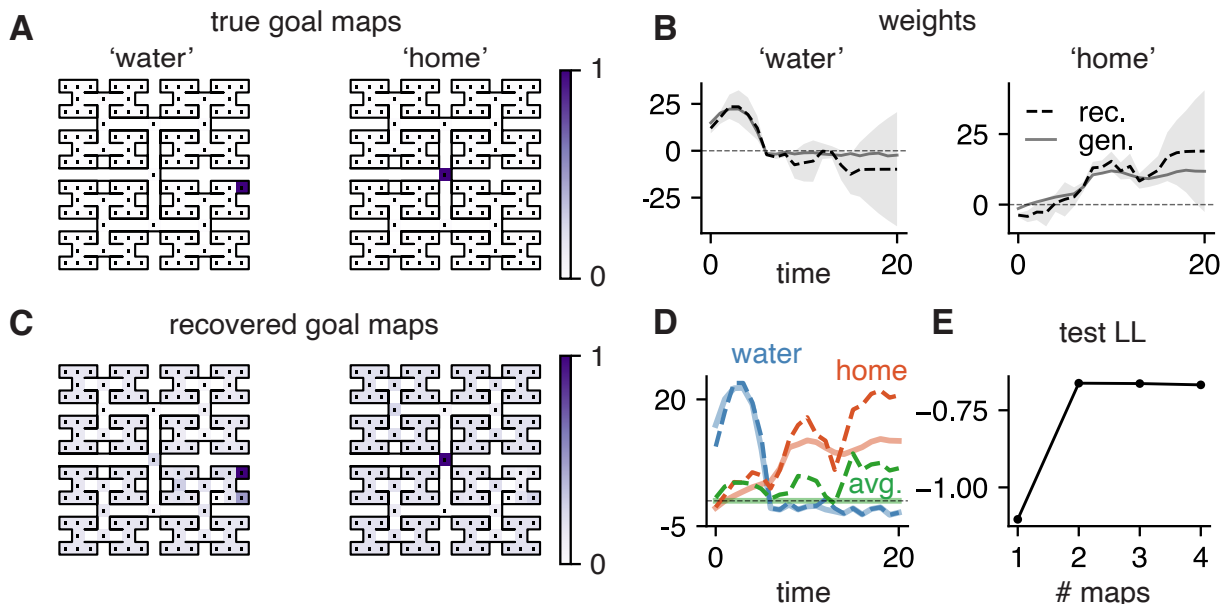

Figure S2: Simulations in the labyrinth environment. **(A)** Generative goal maps for labyrinth simulations: one goal map has the water state as highly rewarding, while the second has the home state as highly rewarding. **(B)** Generative (solid) and recovered (dashed) time-varying weights for 2-map solution. 95% confidence intervals, obtained via the inverse Hessian of the log-posterior (Eq. 6) at the MAP estimate of the weights, are also shown. Note: we use the same time-varying weights as were recovered from applying DIRL to the water-restricted mice in Figure 4. **(C)** Recovered goal maps in the 2-map solution. **(D)** Generative (solid) and recovered (dashed) time-varying reward function. We show the reward function for the water state (blue), the home state (red) and the average reward for all other states (green). **(E)** Validation set log-likelihood (in units of bits/decision) as a function of the number of goal maps. Reassuringly, this peaks at the generative setting of 2 maps.

154 show the recovered time-varying weights, goal maps and reward function for the 2-map solution in panels B, C and D  
 155 respectively.

156 When performing this analysis, we swept across a similar grid of hyperparameters to those described in section  
 157 A.3, which we document in Table S3 for completeness. As described earlier, we used validation-set performance to  
 158 distinguish between different hyperparameter settings. Figure S2 corresponds to setting  $K = 2$ ,  $\sigma = 1$ ,  $\lambda = 0.001$  and  
 159 the learning rate for the maps to 0.05 and the learning rate for the weights to 0.01.

| Hyperparameter               | Range                                |
|------------------------------|--------------------------------------|
| no. of maps, $K$             | {1, 2, 3, 4}                         |
| noise variance, $\sigma$     | {1, $2^{-1}$ , $2^{-2}$ , $2^{-3}$ } |
| $l_2$ coefficient, $\lambda$ | { $1e-2$ , $1e-1$ , 1.0}             |
| learning rate for maps       | {0.05, 0.01, 0.005, 0.001}           |
| learning rate for weights    | {0.05, 0.01, 0.005}                  |

Table S3: Hyperparameters for fitting DIRL on simulated labyrinth trajectories

## 160 D.2 Additional results on real data: 3-map fits for water-restricted mice

161 In Figure 4 we focused on the 2-map fits for the water-restricted animals. However, since the 3-map solution obtained  
 162 comparable validation performance for this cohort, we show the 3-map fits for this cohort here. As can be observed in  
 163 Figure S3, the ‘water’ goal map is effectively repeated (maps 1 and 3 in panel A), so that the overall reward function  
 164 (panel C) for the 3-map solution is similar to that obtained in the 2-map solution. Due to the fact that one map is  
 165 effectively repeated – thus suggesting two principal maps – we chose to focus on the 2-map fits in the main text.

### water-restricted animals; 3-map solution

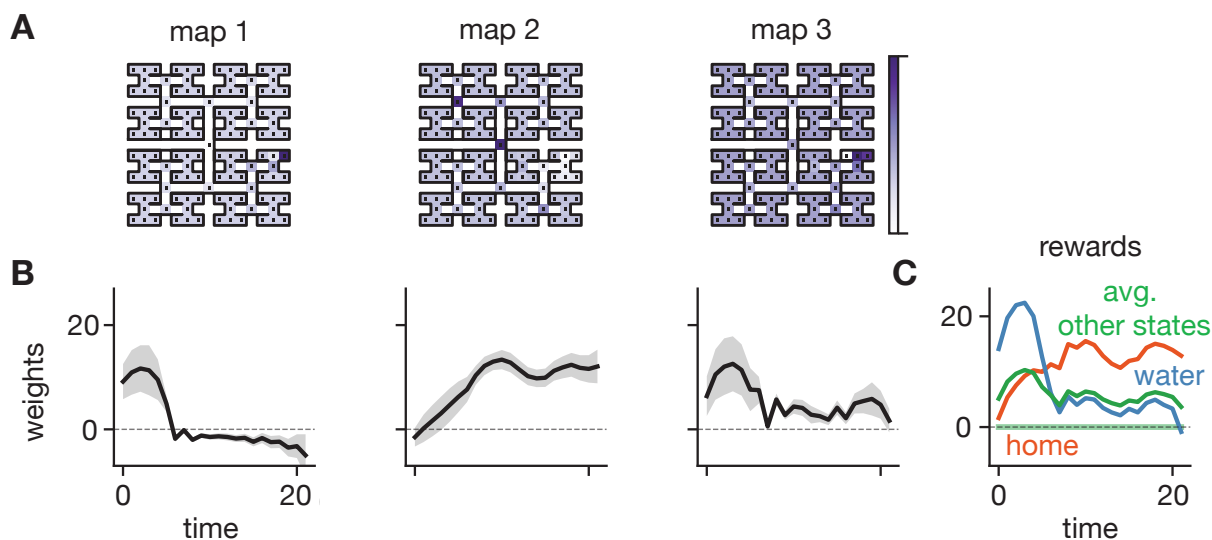

Figure S3: 3-map solution for water-restricted animals. (A) Recovered goal maps. Maps 1 and 3 are very similar. (B) Recovered time-varying weights placed on each of the 3 maps. (C) Recovered time-varying reward function: blue shows the reward for the water state, red shows the reward for the home state, while green shows the average reward for all other states.

### 166 D.3 Trajectories simulated by DURL better resemble mouse data compared to those from other IRL methods

167 In order to further demonstrate the utility of DURL compared to existing IRL methods, we simulated trajectories using  
168 DURL, maximum entropy IRL [1] and deep maximum entropy IRL [2] when parameters of these frameworks were fit to  
169 the trajectories of the water-restricted mice. In panels A-C of Figure S4, we show example simulated trajectories for the  
170 3 methods. In panel D, we show the number of simulated trajectories (out of 200) that made it to the water state, and  
171 compare this to the number of real trajectories that made it to the water state in the same time period (199 out of 200).  
172 Surprisingly, *none* of the trajectories simulated by the maximum entropy and deep maximum entropy methods reached  
173 the water state in the time available, while 191 out of 200 reached the water port for DURL. Clearly, DURL is better  
174 suited to explaining the trajectory data of real mice compared to existing IRL methods.

### 175 E Code implementation of DURL

176 At [https://github.com/97aditi/dynamic\\_irl](https://github.com/97aditi/dynamic_irl), we provide an implementation of DURL. We use PyTorch 1.11.0  
177 [12] to perform the optimizations of Equations 5 and 6. We also used code from the original Rosenberg et al. [4] paper  
178 (available at <https://github.com/markusmeister/Rosenberg-2021-Repository>) in order to produce some of  
179 our plots – our repository contains copies of the scripts we used.

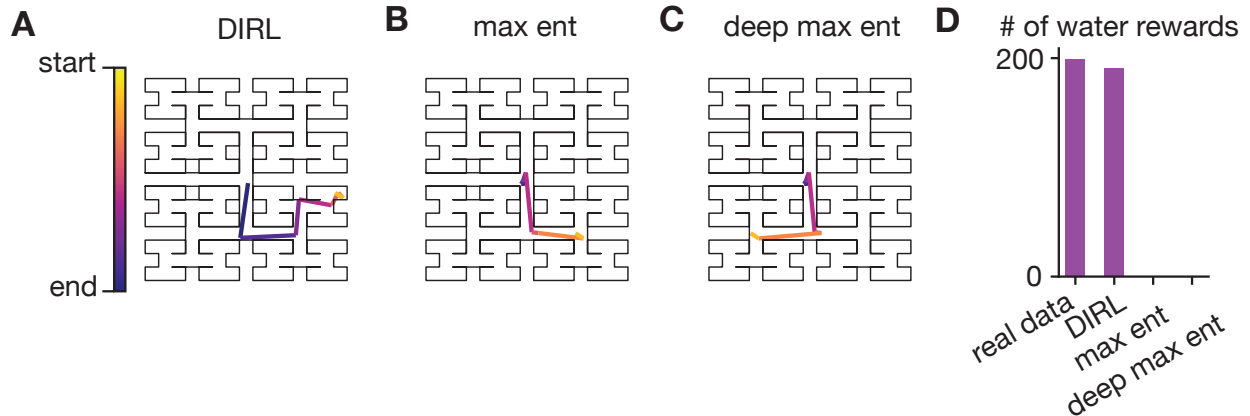

Figure S4: Simulated trajectories of length 8 for three different IRL methods (with parameters fit on the trajectories of water-restricted mice): (A) DIRT. (B) Maximum entropy framework of [1]. (C) Deep maximum entropy framework of Wulfmeier et al. [2]. (D) Number of water rewards obtained by each method in a total of 200 simulated trajectories of length 8 each (the maximum number of steps to reach the water port for the water-restricted mice is 8). Note that *none* of the trajectories for the Max. Ent. and Deep Max. Ent. methods made it to the water port, while 191 trajectories simulated by DIRT made it there.

## References

- 180
- 181 [1] Brian D. Ziebart, Andrew Maas, J. Andrew Bagnell, and Anind K. Dey. Maximum entropy inverse reinforcement  
182 learning. In *Proc. AAAI*, pages 1433–1438, 2008.
- 183 [2] Markus Wulfmeier, Peter Ondruska, and Ingmar Posner. Maximum entropy deep inverse reinforcement learning.  
184 *arXiv preprint arXiv:1507.04888*, 2015.
- 185 [3] Yiren Lu. IRL-Imitation, 2017. URL <https://github.com/yrlu/irl-imitation>.
- 186 [4] Matthew Rosenberg, Tony Zhang, Pietro Perona, and Markus Meister. Mice in a labyrinth show rapid learning,  
187 sudden insight, and efficient exploration. *eLife*, 10:e66175, July 2021. ISSN 2050-084X. doi: 10.7554/eLife.66175.  
188 URL <https://doi.org/10.7554/eLife.66175>. Publisher: eLife Sciences Publications, Ltd.
- 189 [5] Martin Ester, Hans-Peter Kriegel, and Xiaowei Xu. A Density-Based Algorithm for Discovering Clusters in Large  
190 Spatial Databases with Noise. page 6, 1996.
- 191 [6] F. Pedregosa, G. Varoquaux, A. Gramfort, V. Michel, B. Thirion, O. Grisel, M. Blondel, P. Prettenhofer, R. Weiss,  
192 V. Dubourg, J. Vanderplas, A. Passos, D. Cournapeau, M. Brucher, M. Perrot, and E. Duchesnay. Scikit-learn:  
193 Machine learning in Python. *Journal of Machine Learning Research*, 12:2825–2830, 2011.
- 194 [7] Tuomas Haarnoja, Haoran Tang, Pieter Abbeel, and Sergey Levine. Reinforcement learning with deep energy-  
195 based policies. 2017.
- 196 [8] Leonard E. Baum, Ted Petrie, George Soules, and Norman Weiss. A Maximization Technique Occurring in  
197 the Statistical Analysis of Probabilistic Functions of Markov Chains. *The Annals of Mathematical Statistics*,  
198 41(1):164–171, February 1970. ISSN 0003-4851, 2168-8990. doi: 10.1214/aoms/1177697196. URL <https://projecteuclid.org/journals/annals-of-mathematical-statistics/volume-41/issue-1/A-Maximization-Technique-Occurring-in-the-Statistical-Analysis-of-Probabilistic/10.1214/aoms/1177697196.full>. Publisher: Institute of Mathematical Statistics.
- 202 [9] Monica Babes-Vroman, Vukosi Marivate, Kaushik Subramanian, and Michael L. Littman. Apprenticeship learning  
203 about multiple intentions. In *ICML*, 2011.
- 204 [10] Alex J. Chan and Mihaela van der Schaar. Scalable bayesian inverse reinforcement learning. *arXiv preprint*  
205 *arXiv:2102.06483*, 2021.



- 206 [11] Divyansh Garg, Shuvam Chakraborty, Chris Cundy, Jiaming Song, and Stefano Ermon. IQ-Learn: Inverse soft-Q  
207 Learning for Imitation. *arXiv:2106.12142 [cs]*, December 2021. URL <http://arxiv.org/abs/2106.12142>.  
208 arXiv: 2106.12142.
- 209 [12] Adam Paszke, Sam Gross, Francisco Massa, Adam Lerer, James Bradbury, Gregory Chanan, Trevor Killeen,  
210 Zeming Lin, Natalia Gimelshein, Luca Antiga, Alban Desmaison, Andreas Kopf, Edward Yang, Zachary De-  
211 Vito, Martin Raison, Alykhan Tejani, Sasank Chilamkurthy, Benoit Steiner, Lu Fang, Junjie Bai, and Soumith  
212 Chintala. Pytorch: An imperative style, high-performance deep learning library. In H. Wallach, H. Larochelle,  
213 A. Beygelzimer, F. d'Alché-Buc, E. Fox, and R. Garnett, editors, *Advances in Neural Information Processing*  
214 *Systems* 32, pages 8024–8035. Curran Associates, Inc., 2019. URL [http://papers.neurips.cc/paper/  
215 9015-pytorch-an-imperative-style-high-performance-deep-learning-library.pdf](http://papers.neurips.cc/paper/9015-pytorch-an-imperative-style-high-performance-deep-learning-library.pdf).
